# Supplementary material for: Human activities disrupt the temporal dynamics of salinity in Spanish rivers
Source: Springer Nature journal article supplement (doi:10.1007/s10750-022-05063-9), 2022-11-18
Supplement: MOESM3 [file 10750_2022_5063_MOESM3_ESM.pdf]

Online Resource 3

**Title:** Human activities disrupt the temporal dynamics of salinity in Spanish rivers

**Journal name:** Hydrobiologia

- **Author information: The name(s) of the author(s):**

Alvaro Javier Moyano Salcedo 1,2, Edurne Estévez 3, Humbert Salvadó 4, José Barquín 5, Miguel Cañedo-Argüelles Iglesias 6,7

- **The affiliation(s) of the author(s), i.e. institution, (department), city, (state), country**

1 FEHM-Lab (Freshwater Ecology, Hydrology and Management), Departament de Biologia Evolutiva, Ecologia i Ciències Ambientals, Facultat de Biologia, Universitat de Barcelona, Barcelona, Spain.

2 Geohazards and Civil Engineering Research Group, Department of Civil Engineering, Saint Thomas Villavicencio University, C/22 No 1a, 500003, Villavicencio, Colombia.

3 Department of Ecology, University of Innsbruck, Innsbruck, Austria.

4 Department of Evolutive Biology, Ecology and Environmental Sciences, University of Barcelona, 08028 Barcelona, Spain

5 Environmental Hydraulics Institute 'IH Cantabria', University of Cantabria, PCTCAN. C/ Isabel Torres 15, 39011 Santander, Spain

6 Institute of Environmental Assessment and Water Research (IDAEA-CSIC), Carrer de Jordi Girona, 18-26, 08034, Barcelona, Spain.

7 FEHM-Lab (Freshwater Ecology, Hydrology and Management), Departament de Biologia Evolutiva, Ecologia i Ciències Ambientals, Facultat de Biologia, Institut de Recerca de l'Aigua (IdRA), Universitat de Barcelona, Barcelona, Spain.

- **e-mail address of the corresponding author**

1 A Moyano Salcedo, alvaromoyano@ub.edu

3 E Estévez, Edurne.Estevez-Cano@uibk.ac.at

4 H Salvadó, hsalvado@ub.edu

5 J Barquín, jose.barquin@unican.es

6 M Cañedo-Argüelles, miguel.canedo@idaea.csic.es

Table S5. Electrical conductivity (mean, maximum and minimum values) reported in Spanish rivers affected by different human activities.

| <b>Study</b>                                                                                                                 | <b>River</b>                 | <b>Human drivers of salinization</b>           | <b>Mean conductivity (mS/cm)</b> | <b>Minimum conductivity (mS/cm)</b> | <b>Maximum conductivity (mS/cm)</b> | <b>Reference</b>          |
|------------------------------------------------------------------------------------------------------------------------------|------------------------------|------------------------------------------------|----------------------------------|-------------------------------------|-------------------------------------|---------------------------|
| Seasonal water quality variations in a river affected by acid mine drainage: the Odiel River (South West Spain)              | Odiel River                  | Mining                                         | 1.4                              | 0.16                                | 4.8                                 | Oliás et al., 2004        |
| Evaluation of natural and anthropogenic influences on the Guadalquivir River (Spain) by dissolved heavy metals and nutrients | Guadalquivir River           | Sewage<br>Agriculture                          | 8.8                              | 0.68                                | 50.7                                | Mendiguchia et al., 2007. |
| Trend study and assessment of surface water quality in the Ebro River (Spain)                                                | Ebro river                   | Low pollution regions (low population density) | 0.5                              | 0.2                                 | 0.7                                 | Bouza-Deaño et al., 2008  |
|                                                                                                                              |                              | High pollution zones (sewage, agriculture)     | 1.1                              | 0.8                                 | 1.3                                 |                           |
|                                                                                                                              |                              | Moderate pollution (downstream region)         | 0.9                              | 0.8                                 | 1                                   |                           |
| Hydrochemical characteristics and seasonal influence on the pollution by acid mine drainage                                  | Odiel river Basin (including | Mining                                         | 2.9                              | 0.1                                 | 18.5                                | Sarmiento et al., 2009    |

| <b>Study</b>                                                                                                           | <b>River</b>     | <b>Human drivers of salinization</b> | <b>Mean conductivity (mS/cm)</b> | <b>Minimum conductivity (mS/cm)</b> | <b>Maximum conductivity (mS/cm)</b> | <b>Reference</b>             |
|------------------------------------------------------------------------------------------------------------------------|------------------|--------------------------------------|----------------------------------|-------------------------------------|-------------------------------------|------------------------------|
| in the Odiel river Basin (SW Spain)                                                                                    | the Tinto river) |                                      |                                  |                                     |                                     |                              |
| Pollution by psychoactive pharmaceuticals in the Rivers of Madrid metropolitan area (Spain)                            | Jarama river     |                                      | 0.03                             | -                                   | -                                   | González-Alonso et al., 2010 |
|                                                                                                                        | Bodonal stream   |                                      | 0.6                              | 0.5                                 | 0.8                                 |                              |
|                                                                                                                        | Manzanres river  |                                      | 0.6                              | 0.3                                 | 0.9                                 |                              |
|                                                                                                                        | Guadarrama river |                                      | 0.2                              | 0.02                                | 0.3                                 |                              |
|                                                                                                                        | Soto Stream      | Sewage                               | 0.8                              | -                                   | -                                   |                              |
|                                                                                                                        | Henares river    |                                      | 0.7                              | 0.5                                 | 0.8                                 |                              |
|                                                                                                                        | Tajo river       |                                      | 1.1                              | 1                                   | 1.3                                 |                              |
| Toxicity and potential risk assessment of a river polluted by acid mine drainage in the Iberian Pyrite Belt (SW Spain) | Villar stream    | Mining                               | -                                | 2.9                                 | 3.3                                 | Sarmiento et al., 2011       |

| <b>Study</b>                                                                                                                                                     | <b>River</b>            | <b>Human drivers of salinization</b> | <b>Mean conductivity (mS/cm)</b> | <b>Minimum conductivity (mS/cm)</b> | <b>Maximum conductivity (mS/cm)</b> | <b>Reference</b>            |
|------------------------------------------------------------------------------------------------------------------------------------------------------------------|-------------------------|--------------------------------------|----------------------------------|-------------------------------------|-------------------------------------|-----------------------------|
| Detection of veterinary drug residues in surface waters collected nearby farming areas in Galicia, North of Spain                                                | Miño river              | Agriculture<br>Pasture<br>Urban      | 0.12                             | 0.09                                | 0.17                                | Iglesias et al., 2013.      |
|                                                                                                                                                                  | Asma River              |                                      | 0.06                             | 0.04                                | 0.08                                |                             |
| Impact of potash mining in streams: The Llobregat basin (northeast Spain) as a case study                                                                        | d'Or Stream             | Mining                               | 6.2                              | 1.4                                 | 11                                  | Ladrera et al., 2016.       |
|                                                                                                                                                                  | Llobregat River         |                                      | -                                | -                                   | 2.5                                 |                             |
|                                                                                                                                                                  | Conangle Stream         |                                      | -                                | -                                   | 4..5                                |                             |
|                                                                                                                                                                  | Soldevila Stream        |                                      | -                                | -                                   | 132.4                               |                             |
| Effects of anthropogenic pollution and hydrological variation on macroinvertebrates in Mediterranean rivers: A case-study in the upper Tagus river basin (Spain) | Upper Tagus river basin | Natural                              | 1.8                              | -                                   | -                                   | Arenas-Sánchez et al., 2021 |
|                                                                                                                                                                  |                         | Agriculture                          | 5                                | -                                   | -                                   |                             |
|                                                                                                                                                                  |                         | Urban                                | 1.4                              | -                                   | -                                   |                             |

---

| <b>Study</b>                                                                                                                                                   | <b>River</b> | <b>Human drivers of salinization</b>   | <b>Mean conductivity (mS/cm)</b> | <b>Minimum conductivity (mS/cm)</b> | <b>Maximum conductivity (mS/cm)</b> | <b>Reference</b>    |
|----------------------------------------------------------------------------------------------------------------------------------------------------------------|--------------|----------------------------------------|----------------------------------|-------------------------------------|-------------------------------------|---------------------|
| Hydrogeological, hydrodynamic and anthropogenic factors affecting the spread of pharmaceuticals and pesticides in water resources of the Granada plain (Spain) | Genil river  | Agriculture (irrigation)<br>Urban area | 1.1                              | 0.7                                 | 1.3                                 | Llamas et al., 2022 |

---
